# Supplementary material for: A Prospective Evaluation of Early Detection Biomarkers for Ovarian Cancer in the European EPIC Cohort
Source: Oxford University Press journal article supplement (doi:10.1158/1078-0432.ccr-16-0316), 2016-04-08
Supplement: 10780432ccr160316-sup-161836_1_supp_3385874_73gdbx.docx [file 10780432ccr160316-sup-161836_1_supp_3385874_73gdbx.docx]

**Supplementary Table S4.** Evaluation of added discriminatory ability of each biomarker using Net Reclassification Improvement a

|  |  | **NRI (Model 2 vs. Model 1) b** | **NRI (Model 3 vs. Model 2) b** | **NRI (Model 4 vs. Model 3) b** |
| --- | --- | --- | --- | --- |
| All women | 197 | 1% (-14% to 17%) | 30% (14% to 45%) | -11% (-27% to 4%) |
| ≤ 6 months | 27 | 13% (-29% to 54%) | 95% (52% to 137%) | -5% (-48% to 37%) |
| ≤ 1 year | 62 | 1% (-26% to 29%) | 81% (53% to 109%) | 0% (-28% to 28%) |
| 1 to 2 years | 76 | 2% (-23% to 27%) | 28% (3% to 54%) | 0% (-25% to 25%) |
| 2 to 3 years | 59 | 0% (-28% to 29%) | 11% (-18% to 40%) | -2% (-30% to 27%) |

a Conditional logistic regression model with log2-transformed markers as continuous variables

b Net reclassification improvement (NRI) in % and 95%-confidence intervals. Model 1= CA125 alone, Model 2=CA125 + HE4, Model 3=CA125 + HE4 + CA72.4, Model 4=CA125 + HE4 + CA72.4 + CA15.3
